# Supplementary material
Source: publisher figshare collection journal article supplement (https://sage.figshare.com/ndownloader/files/20045774)
Supplement: Supplementary file 1 [file 20045774]

## Supplemental Material

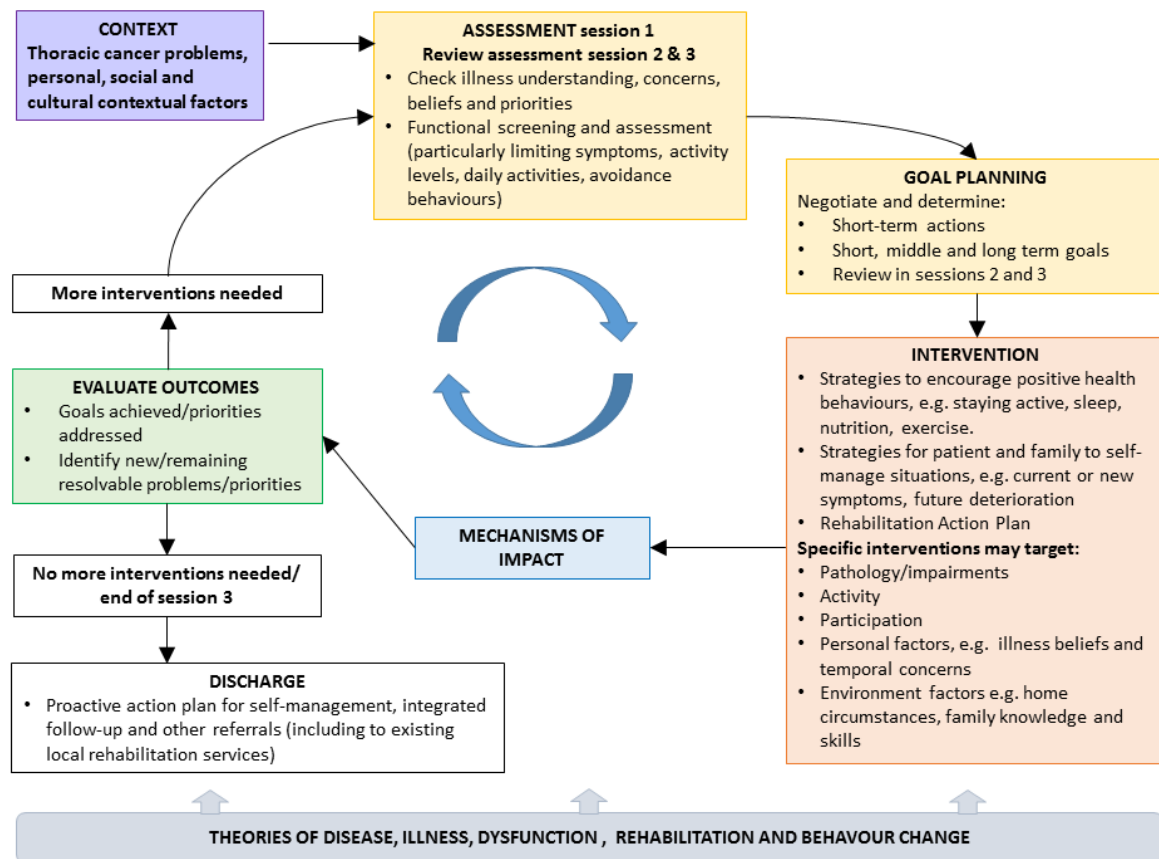

Figure 1 Conceptual Model of Short Term Integrated Rehabilitation for Thoracic Cancer (adapted from Wade 2005 [13]).

## **Appendix 1**

| <b>Grade</b> | <b>Eastern Cooperative Oncology Group Performance Status</b>                                                                                            |
|--------------|---------------------------------------------------------------------------------------------------------------------------------------------------------|
| 0            | Fully active, able to carry on all pre-disease performance without restriction                                                                          |
| 1            | Restricted in physically strenuous activity but ambulatory and able to carry out work of a light or sedentary nature, e.g. light housework, office work |
| 2            | Ambulatory and capable of self-care but unable to carry out work activities; up and about for more than 50% of waking hours                             |
| 3            | Capable of limited self-care, confined to bed or chair for more than 50% of waking hours                                                                |
| 4            | Completely disabled, cannot carry on any self-care, totally confined to bed or chair                                                                    |

Supplementary Table 1 Details of rehabilitation strategies and behaviour change techniques

| Rehabilitation Strategies                       |                                            | N (%)    |
|-------------------------------------------------|--------------------------------------------|----------|
| Symptom management strategies:                  | Breathlessness                             | 15 (60)  |
|                                                 | Fatigue                                    | 17 (68)  |
|                                                 | Pain                                       | 8 (32)   |
|                                                 | Nutrition/appetite                         | 8 (32)   |
|                                                 | Sleep                                      | 7 (28)   |
|                                                 | Leaflet                                    | 11 (44)  |
| Physical activity/fitness strategies:           | Physical activity strategies               | 24 (96)  |
|                                                 | Exercise prescription                      | 22 (88)  |
|                                                 | Leaflet                                    | 20 (80)  |
| Task performance/participation strategies:      | Personal ADL <sup>a</sup>                  | 3 (12)   |
|                                                 | Domestic ADL                               | 16 (64)  |
|                                                 | Instrumental ADL                           | 20 (80)  |
| Behaviour Change Techniques (BCTs) <sup>b</sup> |                                            |          |
| BCT Group                                       | BCT label                                  |          |
| Goals and planning                              | Goal setting behaviour                     | 23 (92)  |
|                                                 | Problem solving                            | 19 (76)  |
|                                                 | Goal-setting outcome                       | 20 (80)  |
|                                                 | Action planning                            | 24 (96)  |
|                                                 | Review behaviour                           | 22 (88)  |
|                                                 | Review outcome goals                       | 17 (68)  |
| Feedback and monitoring                         | Feedback on behaviour                      | 23 (92)  |
|                                                 | Self-monitoring of behaviour               | 21 (84)  |
|                                                 | Self-monitoring of outcomes of behaviour   | 9 (36)   |
| Social support                                  | Unspecified                                | 3 (12)   |
|                                                 | Practical                                  | 14 (56)  |
|                                                 | Emotional                                  | 10 (40)  |
| Shaping knowledge                               | Instruction on how to perform behaviour    | 24 (96)  |
|                                                 | Information about antecedents of behaviour | 5 (20)   |
|                                                 | Behavioural experiments                    | 1 (4)    |
| Natural consequences                            | Information about health consequences      | 25 (100) |
|                                                 | Monitoring of emotional consequences       | 7 (28)   |
|                                                 | Information about emotional consequences   | 7 (28)   |
| Comparison of behaviour                         | Demonstration of behaviour                 | 23 (92)  |
| Associations                                    | Prompts and cues                           | 11 (44)  |
| Repetition and substitution                     | Behavioural practice                       | 21 (84)  |
|                                                 | Habits formation                           | 13 (52)  |
|                                                 | Graded tasks                               | 15 (60)  |
| Comparison of outcomes                          | Credible Source                            | 25 (100) |
|                                                 | Comparative imagining of future outcomes   | 4 (16)   |
| Regulation                                      | Reduce negative emotions                   | 12 (48)  |
| Antecedents                                     | Restructuring the physical environment     | 0 (0)    |
|                                                 | Restructuring the social environment       | 0 (0)    |
|                                                 | Adding objects to the environment          | 9 (36)   |
| Identity/Self Belief                            | Framing/reframing                          | 6 (24)   |
|                                                 | Verbal persuasion about capability         | 21 (84)  |
|                                                 | Focus on past success                      | 2 (8)    |
|                                                 | Self-talk                                  | 5 (20)   |

<sup>a</sup> ADL = activities of daily living, <sup>b</sup> classified according to the Behaviour Change Techniques Taxonomy version 1 (Michie 2014)

Supplementary Table 2. Missing data at follow up

| Variables                                            | Values*                             | Total obtained<br>(N) | Missing of obtained<br>N (%) | Total obtained<br>(N) | Missing of obtained<br>N (%) |
|------------------------------------------------------|-------------------------------------|-----------------------|------------------------------|-----------------------|------------------------------|
| Patient Reported Measures                            | Values*                             | 30 days               |                              | 60 days               |                              |
| iPOS (17 items)<br>Lower scores = fewer symptoms     | 0-68                                | 44                    | 1 (2)                        | 39                    | 3 (8)                        |
| PASE (12 Items)<br>Higher scores = more active       | 0-400                               | 44                    | 0                            | 39                    | 0                            |
| FACT L (34 items)<br>Higher scores = higher QoL      | 0-136                               | 44                    | 1 (2)                        | 39                    | 0                            |
| FACT TOI (21 items)<br>Higher score = higher QoL     | 0-84                                | 44                    | 1 (2)                        | 39                    | 0                            |
| SEMCD (6 items)<br>Higher score = greater confidence | 0-10                                | 44                    | 0                            | 39                    | 1 (3)                        |
| EQ-5D-5L (Index values)<br>Lower score = higher QoL  | 0-1                                 | 44                    | 0                            | 39                    | 2 (4)                        |
| EQ VAS Higher score = higher QoL                     | 0-100                               | 44                    | 0                            | 39                    | 2 (4)                        |
| CSRI <sup>a</sup> - Hospital based care              | Yes/no; number/information          | 44                    | 6 (14)                       | 39                    | 7 (18)                       |
| CSRI- Community based care                           | Yes/no; number/duration/information | 44                    | 6(14)                        | 39                    | 4 (10)                       |
| CSRI-Investigations                                  | Yes/no; number/duration/information | 44                    | 10 (23)                      | 39                    | 6 (15)                       |
| CSRI- Personal Care                                  | Yes/no; number/duration/information | 44                    | 20 (45)                      | 39                    | 10 (26)                      |
| CSRI-Equipment                                       | Yes/no; number/duration/information | 44                    | 3 (7)                        | 39                    | 2 (5)                        |
| CSRI- Medication                                     | Yes/no; number/duration/information | 44                    | 3 (7)                        | 39                    | 5 (13)                       |
| Trial Satisfaction (4 items)                         | 0-4                                 | 44                    | 1 (6)                        | n/a                   | n/a                          |
| Treatment satisfaction (10 items)                    | 9 items 0-3<br>1 item 0-4           | 15/25 expected        | 1 (6)                        | n/a                   | n/a                          |

IPOS =Integrated Palliative Care Outcome Scale; PASE= Physical Activity Scale for the Elderly; FACT-L/TOI/LCS = Functional Assessment of Cancer Therapy- Lung/trial outcome index/lung cancer subscale; SEMCD = Self-Efficacy Measure for Chronic Disease; FACIT-PS-TS = Functional Assessment of chronic illness therapy treatment/ patient satisfaction. CSRI = Client Services Receipt Inventory. <sup>a</sup>Domain data is recorded missing if contact and frequency items within the domain were missing
